# Supplementary material for: Formin’ cellular structures: Physiological roles of Diaphanous (Dia) in actin dynamics
Source: PubMed Central journal article supplement — Commun Integr Biol. 2014 Jan 8;6(6):e27634. doi: 10.4161/cib.27634 (PMC3977921; doi:10.4161/cib.27634), 2014-01-08
Supplement: cib-6-e27634-s01.pdf [file cib-6-e27634-s01.pdf]

## **Supplemental Material to:**

**Sven Bogdan\*, Jörg Schultz, and Jörg Grosshans\***

**Formin' cellular structures: Physiological roles of  
Diaphanous (Dia) in actin dynamics**

**Communicative & Integrative Biology 2013; 6(6)**

**<http://dx.doi.org/10.4161/cib.27634>**

**<http://www.landesbioscience.com/journals/cib/article/27634>**

## 1 **Supplementary information**

2 Metazoan and fungal sequences were extracted from Ensembl (<http://www.ensembl.org>),  
3 *Monosiga brevicollis* from the Joint Genome Institute (<http://genome.jgi.doe.gov>) and  
4 *Capsaspora owczarzakii* from the Broad Institute (<http://www.broadinstitute.org>). The  
5 sequences had to contain a GTPase binding (Pfam PF06371), a FH3 (PF06367) and a FH2  
6 domain (PF02181) <sup>172</sup>. To avoid edge effects caused by PFAMs local domain detection,  
7 SMART<sup>9</sup> was used to delineate the position of the domains in the extracted sequences. To  
8 focus the tree reconstruction on conserved positions, domain sequences were extracted and  
9 concatenated. An alignment was calculated using MUSCLE with default parameters <sup>10</sup>.  
10 Models for the phylogenetic tree reconstruction were estimated by ProtTest resulting in  
11 LG+I+G+F <sup>11</sup>. The tree was calculated with PHYML <sup>173</sup> and robustness estimated by  
12 approximate likelihood ratio tests <sup>174</sup>. Diaphanous Sequences: *Homo sapiens*:  
13 ENSG00000131504 DIAPH1; ENSG00000147202 DIAPH2; ENSG00000139734 DIAPH3.  
14 *Ciona savignyi*: ENSCSAVG00000008096. *Drosophila melanogaster*: FBgn0011202 dia.  
15 *Caenorhabditis elegans*: F11H8.4 Cyk-1. *Amphimedon queenslandica*: Aqu1.221683.  
16 *Trichoplax adherens*: TriadG60005. *Monosiga brevicollis*: A9UVG5.1. *Capsaspora*  
17 *owczarzakii*: E9CGJ0.1, E9C1Z5.1

18

## 19 **Supplementary Table 1**

Table A - Differentially conserved sites between Dia1 and Dia2 / 3

| Position in mDia1 | Z-score | AA in Dia1 | AA in Dia2 and 3 |
|-------------------|---------|------------|------------------|
| 41                | 5,47    | E          | D                |
| 91                | 5,2     | L          | M                |
| 101               | 5,86    | Q          | K                |
| 125               | 5,34    | A          | K                |
| 138               | 5,54    | M          | E                |
| 164               | 6,24    | N          | T                |
| 165               | 6,23    | N          | S                |
| 187               | 6,6     | K          | E                |
| 207               | 6,6     | E          | K                |
| 210               | 6,61    | R          | Q                |
| 225               | 6,61    | M          | I                |
| 232               | 5,89    | I          | L                |
| 262               | 5,88    | Q          | E                |
| 302               | 5,9     | K          | Q                |
| 313               | 5,87    | I          | V                |
| 327               | 5,89    | S          | N                |
| 351               | 5,26    | V          | I                |
| 487               | 6,62    | H          | Q                |
| 762               | 5,89    | L          | M                |

Table B - Differentially conserved sites between Dia2 and Dia3. Sites identical to Dia1 in bold.

| Position in mDia1 | Z-score | AA in Dia1 | AA in Dia2 | AA in Dia3 |
|-------------------|---------|------------|------------|------------|
| 249               | 5,46    | D          | E          | <b>D</b>   |
| 323               | 5,42    | V          | I          | L          |
| 330               | 5,47    | M          | L          | <b>M</b>   |
| 359               | 5,48    | Q          | N          | H          |
| 422               | 5,46    | Y          | <b>Y</b>   | F          |
| 756               | 5,46    | Y          | <b>Y</b>   | F          |
| 833               | 5,08    | K          | R          | <b>K</b>   |
| 986               | 5,12    | F          | <b>F</b>   | S          |

1

2
